# Supplementary material
Source: MDPI journal article supplement (https://www.mdpi.com/2227-7102/12/12/878)
Supplement: s1 [file s1]

Archive with 4 entries (4 files):
- Supplementary Material S1.pdf
- Supplementary Material S2.pdf
- Supplementary Material S3.pdf
- Supplementary Material S4.pdf
